# Supplementary material
Source: MDPI journal article supplement (https://www.mdpi.com/1424-2818/16/1/11)
Supplement: s1 [file s1]

## Supplementary material

Article title: Orthoptera community dynamics and conservation in a Natura 2000 site (Greece): the role of beta diversity. Authors: Stefanidis, A., Zografou, K., Tzortzakaki, O., and Kati. V.

**Table S1.** The Orthoptera fauna of Mt Mitsikeli according to the Greek Orthoptera atlas [1] and the current research.

|    | Suborder  | Family    | Species                             | Greek<br>Orthoptera<br>atlas | Current<br>research |
|----|-----------|-----------|-------------------------------------|------------------------------|---------------------|
| 1  |           |           | <i>Acrida ungarica</i>              |                              | ●                   |
| 2  |           |           | <i>Aiolopus streppens</i>           |                              | ●                   |
| 3  |           |           | <i>Arcyptera microptera</i>         | ●                            | ●                   |
| 4  |           |           | <i>Calliptamus barbarus</i>         | ●                            |                     |
| 5  |           |           | <i>Calliptamus italicus</i>         | ●                            | ●                   |
| 6  |           |           | <i>Celes variabilis</i>             | ●                            |                     |
| 7  |           |           | <i>Chorthippus biguttulus</i>       | ●                            |                     |
| 8  |           |           | <i>Chorthippus bornhalmi</i>        | ●                            | ●                   |
| 9  |           |           | <i>Chorthippus dichrous</i>         | ●                            | ●                   |
| 10 |           |           | <i>Chorthippus mollis</i>           | ●                            | ●                   |
| 11 |           |           | <i>Dociostaurus brevicollis</i>     | ●                            | ●                   |
| 12 |           |           | <i>Dociostaurus maroccanus</i>      | ●                            |                     |
| 13 |           |           | <i>Euchorthippus declivus</i>       | ●                            | ●                   |
| 14 |           | Acrididae | <i>Locusta migratoria</i>           |                              | ●                   |
| 15 | Caelifera |           | <i>Myrmeleotettix maculatus</i>     | ●                            |                     |
| 16 |           |           | <i>Oedipoda caerulescens</i>        | ●                            | ●                   |
| 17 |           |           | <i>Oedipoda germanica</i>           | ●                            | ●                   |
| 18 |           |           | <i>Omocestus haemorrhoidalis</i>    | ●                            |                     |
| 19 |           |           | <i>Omocestus rufipes</i>            | ●                            | ●                   |
| 20 |           |           | <i>Paracaloptenus caloptenoides</i> |                              | ●                   |
| 21 |           |           | <i>Pezotettix giornae</i>           | ●                            | ●                   |
| 22 |           |           | <i>Pseudochorthippus parallelus</i> | ●                            | ●                   |
| 23 |           |           | <i>Stauroderus scalaris</i>         | ●                            |                     |
| 24 |           |           | <i>Stenobothrus fischeri</i>        | ●                            | ●                   |
| 25 |           |           | <i>Stenobothrus lineatus</i>        | ●                            |                     |
| 26 |           |           | <i>Stenobothrus nigromaculatus</i>  | ●                            |                     |
| 27 |           |           | <i>Stenobothrus rubicundulus</i>    | ●                            |                     |

|    |          |               |                                 |   |   |
|----|----------|---------------|---------------------------------|---|---|
| 28 |          | Gryllidae     | <i>Gryllus campestris</i>       | ● | ● |
| 29 |          |               | <i>Acrometopa servillea</i>     | ● |   |
| 30 |          |               | <i>Leptophyes punctatissima</i> | ● | ● |
| 31 |          |               | <i>Metaplastes ornatus</i>      | ● |   |
| 32 |          |               | <i>Poecilimon jonicus</i>       | ● | ● |
| 33 |          |               | <i>Polysarcus denticauda</i>    | ● |   |
| 34 |          |               | <i>Tylopsis lilifolia</i>       | ● | ● |
| 35 |          |               | <i>Decticus albifrons</i>       | ● | ● |
| 36 |          |               | <i>Decticus verrucivorus</i>    | ● | ● |
| 37 |          |               | <i>Eupholidoptera schmidtii</i> | ● | ● |
| 38 |          |               | <i>Meconema thalassinum</i>     | ● |   |
| 39 |          |               | <i>Pholidoptera femorata</i>    | ● | ● |
| 40 | Ensifera | Tettigoniidae | <i>Platycleis affinis</i>       | ● | ● |
| 41 |          |               | <i>Platycleis albopunctata</i>  | ● | ● |
| 42 |          |               | <i>Platycleis intermedia</i>    | ● | ● |
| 43 |          |               | <i>Psorodonotus macedonicus</i> | ● |   |
| 44 |          |               | <i>Rhacocleis germanica</i>     | ● | ● |
| 45 |          |               | <i>Saga hellenica</i> *         |   | ● |
| 46 |          |               | <i>Sepiana sepium</i>           | ● | ● |
| 47 |          |               | <i>Tessellana orina</i>         | ● | ● |
| 48 |          |               | <i>Tettigonia caudata</i>       | ● |   |
| 49 |          |               | <i>Tettigonia viridissima</i>   | ● | ● |
| 50 |          |               | <i>Vichetia oblongicollis</i> * |   | ● |

1. Willemse, L.; Kleukers, R.; Odé, B. *The grasshoppers of Greece*; EIS Kenniscentrum Insecten en andere ongewervelden: **2018**.

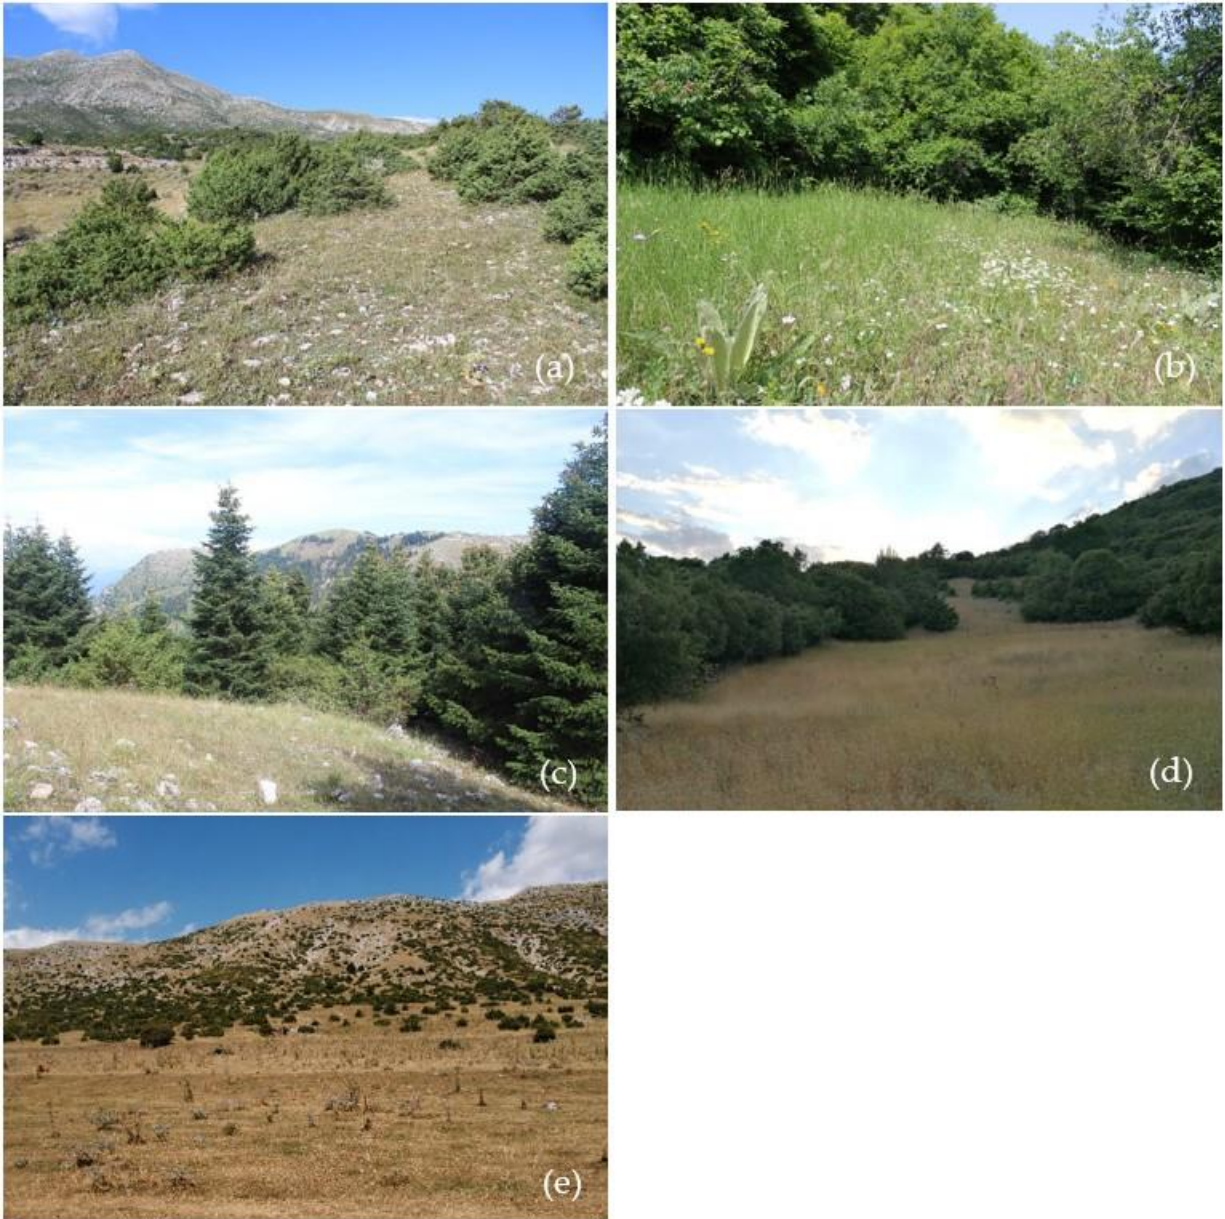

**Figure S1.** Photos of the five main habitats that were sampled in Mt Mitsikeli: (a) Mediterranean scrubs, (b) Mixed thermophilus forests, (c) Beech – fir forests, (d) Agricultural land, (e) Mountain grasslands.
